# Supplementary material
Source: PubMed Central journal article supplement (PMC3302509)
Supplement: supp_86.7.3675_DataS1.pdf [file supp_86.7.3675_DataS1.pdf]

# Supplemental Material

## DNA alignment of *tirant env* sequences

D. melanogaster

|          |              |                                                               |
|----------|--------------|---------------------------------------------------------------|
| JN786085 | (variant Ca) | ATGGAACAATTCCATCTGACCATTAATAAAATTTAACCCCGATTCCACGTTGACGGACTCC |
| JN786086 | (variant Ca) | ATGGAACAATTCCATCTGACCATTAATAAAATTTAACCCCGATTCTACGTTGACGGACTCC |
| JN786087 | (variant Ca) | ATGGAACAATTCCATCTGACCATTAATAAAATTTAACCCCGATTCTACGTTGACGGACTCC |
| JN786088 | (variant Ca) | ATGGAACAATTCNTCTGACCATTAATAAAATTTAACCCCGATTCCACGTTGACGGACTCC  |
| JN786089 | (variant Ca) | ATGGAACAATTCaTCTGACCATTAATAAAATTTAACCCCGATTCCACGTTGACGGACTCC  |
| JN786090 | (variant Ca) | ATGGAACAATTCNTCTGACCATTAATAAAATTTAACCCCGATTCTACGTTGACGGACTCC  |
| JN786091 | (variant Ca) | ATGGAACAATTCATCTGACCATTAATAAAATTTAACCCCGATTCTACGTTGACGGACTCC  |
| JN786092 | (variant Ca) | ATGGAACAATTCATCTGACCATTAATAAAATTTAACCCCGATTCTACGTTGACGGACTCC  |
| JN786093 | (variant Ca) | ATGGAACAATTCATCTGACCATTAATAAAATTTAACCCCGATTCTACGTTGACGGACTCC  |
| JN786094 | (variant Ca) | ATGGAACAATTCATCTGACCATTAATAAAATTTAACCCCGATTCTACGTTGACGGACTCC  |
| JN786095 | (variant Ca) | ATGGAACAATTCaTCTGACCATTAATAAAATTTAACCCCGATTCTACGTTGACGGACTCC  |
| JN786096 | (variant Cb) | ATGGAACAATTCNTCTGACCATTAATAAATTTCAACCCCGACTCCACTTTGACGGACTCC  |
| JN786097 | (variant Ca) | ATGGAACAATTCATCTGACCATTAATAAAATTTAACCCCGATTCTACGTTGACGGACTCC  |
| JN786098 | (variant Cb) | ATGGAACAATTCATCTGACCATTAATAAAATTTAACCCCGACTCCACTTTGACGGACTCC  |
| JN786099 | (variant Cb) | ATGGAACAATTCNTCTGACCATTAATAAAATTTAATCCCGACTCCACTTTGACGGACTCC  |
| JN786100 | (variant Cb) | ATGGAACAATTCNTCTGACCATTAATAAAATTTAATCCCGACTCCACTTTGACGGACTCC  |
| JN786101 | (variant Cb) | ATGGAACAATTCATCTGACCAttataAAATTTAATCCCGACTCCACTTTGACGGACTCC   |
| JN786102 | (variant Cb) | ATGGAACAATTCATCTGACCATTANTAAATTTAATCCCGACTCCACTTTGACGGACTCC   |
| JN786103 | (variant Ca) | ATGGAACAATTCNTCTGACCNTtaataAAATTTAACCCCGATTCCACGTTGACGGACTCC  |
| JN786104 | (variant Ca) | ATGGAACAATTCATCTGACCATTAATAAAATTTAACCCCGATTCCACGTTGACGGACTCC  |
| JQ219965 | (variant Ca) | ATGGAACAATTCATCTGACCATTAATAAAATTTAACCCCGATTCTACGTTGACGGACTCC  |
| JQ219966 | (variant Ca) | ATGGAACAATTCATCTGACCATTAATAAAATTTAACCCCGATTCTACGTTGACGGACTCC  |
| JQ219967 | (variant Ca) | ATGGAACAATTCATCTGACCATTAATAAAATTTAACCCCGATTCTACGTTGACGGACTCC  |
| JQ219968 | (variant Ca) | ATGGAACAATTCATCTGACCATTAATAAAATTTAACCCCGATTCTACGTTGACGGACTCC  |
| JQ219969 | (variant Ca) | ATGGAACAATTCATCTGACCATTAATAAAATTTAACCCCGATTCTACGTTGACGGACTCC  |
| JQ219970 | (variant Cb) | ATGGAACAATTCATCTGACCATTAATAAAATTTAACCCCGACTCCACTTTGACGGACTCC  |
| JQ219971 | (variant Cb) | ATGGAACAATTCATCTGACCATTAATAAAATTTAACCCCGACTCCACTTTGACGGACTCC  |

D. melanogaster

|          |              |                                                               |
|----------|--------------|---------------------------------------------------------------|
| JN786085 | (variant Ca) | GTCACAATTTTAAAAACCAAAATTAACCCAAGCCCAAGTAAAGCTCAAAGCCCTTACACCT |
| JN786086 | (variant Ca) | GTCACAATTTTAAAAAGCCAAATTAACCCAAGCCCAAGTAAAGCTCANAGCCCTTACACCA |
| JN786087 | (variant Ca) | GTCACAATTTTAAAAAGCCAAATTAACCCAAGCCCAAGTAAAGCTCAAAGCCCTTACACCA |
| JN786088 | (variant Ca) | GTCACAATTTTAAAAAGCCAAATTAACCCAAGCCCAAGTAAAGCTCANAGCCCTTACACCT |
| JN786089 | (variant Ca) | GTCACAATTTTAAAAAGCCAAATTAACCCAAGCCCAAGTAAAGCTCAAAGCCCTTACACCT |
| JN786090 | (variant Ca) | GTCACAATTTTAAAAAGCCAAATTAACCCAAGCCCAAGTAAAGCTCAAAGCCCTTACACCA |
| JN786091 | (variant Ca) | GTCACAATTTTAAAAAGCCAAATTAACCCAAGCCCAAGTAAAGCTCAAAGCCCTTACACCA |
| JN786092 | (variant Ca) | GTCACAATTTTAAAAAGCCAAATTAACCCAAGCCCAAGTAAAGCTCAAAGCCCTTACACCA |
| JN786093 | (variant Ca) | GTCACAATTTTAAAAAGCCAAATTAACCCAAGCCCAAGTAAAGCTCAAAGCCCTTACACCA |
| JN786094 | (variant Ca) | GTCACAATTTTAAAAAGCCAAATTAACCCAAGCCCAAGTAAAGCTCAAAGCCCTTACACCA |
| JN786095 | (variant Ca) | GTCACAATTTTAAAAAGCCAAATTAACCCAAGCCCAAGTAAAGCTCAAAGCCCTTACACCA |
| JN786096 | (variant Cb) | GTCACAATTTTAAAAAGCCAAATTAACCCAAGCCCAAGTAAAGCTCAAAGCCCTTACGCCA |
| JN786097 | (variant Ca) | GTCACAATTTTAAAAAGCCAAATTAACCCAAGCCCAAGTAAAGCTCAAAGCCCTTACACCA |
| JN786098 | (variant Cb) | GTCACAATTTTAAAAAGCCAAATTAACCCAAGCCCAAGTAAAGCTCAAAGCCCTTACGCCA |
| JN786099 | (variant Cb) | GTCACAATTTTAAAAAGCCAAATTAACCCAAGCCCAAGTAAAGCTCAAAGCCCTTACGCCA |
| JN786100 | (variant Cb) | GTCACAATTTTAAAAAGCCAAATTAACCCAAGCCCAAGTAAAGCTCAAAGCCCTTACGCCA |
| JN786101 | (variant Cb) | GTCACAATTTTAAAAAGCCAAATTAACCCAAGCCCAAGTAAAGCTCAAAGCCCTTACGCCA |
| JN786102 | (variant Cb) | GTCACAATTTTAAAAAGCCAAATTAACCCAAGCCCAAGTAAAGCTCAAAGCCCTTACGCCA |
| JN786103 | (variant Ca) | GTCACAATTTTAAAAAGCCAAATTAACCCAAGCCCAAGTAAAGCTCAAAGCCCTTACACCT |
| JN786104 | (variant Ca) | GTCACAATTTTAAAAAGCCAAATTAACCCAAGCCCAAGTAAAGCTCAAAGCCCTTACACCT |
| JQ219965 | (variant Ca) | GCCACAATTTTAAAAAGCCAAATTAACCCAAGCCCAAGTAAAGCTCAAAGCCCTTACACCA |
| JQ219966 | (variant Ca) | GCCACAATTTTAAAAAGCCAAATTAACCCAAGCCCAAGTAAAGCTCAAAGCCCTTACACCA |
| JQ219967 | (variant Ca) | GCCACAATTTTAAAAAGCCAAATTAACCCAAGCCCAAGTAAAGCTCAAAGCCCTTACACCA |
| JQ219968 | (variant Ca) | GCCACAATTTTAAAAAGCCAAATTAACCCAAGCCCAAGTAAAGCTCAAAGCCCTTACACCA |
| JQ219969 | (variant Ca) | GCCACAATTTTAAAAAGCCAAATTAACCCAAGCCCAAGTAAAGCTCAAAGCCCTTACACCA |
| JQ219970 | (variant Cb) | GTCACAATTTTAAAAAGCCAAATTAACCCAAGCCCAAGTAAAGCTCAAAGCCCTTACGCCA |
| JQ219971 | (variant Cb) | GTCACAATTTTAAAAAGCCAAATTAACCCAAGCCCAAGTAAAGCTCAAAGCCCTTACGCCA |

D. melanogaster

|          |              |                                                              |
|----------|--------------|--------------------------------------------------------------|
| JN786085 | (variant Ca) | TCATATAGAAACAAACGGGGTTTGATTAACGGATTGGGGAGTCTAGTAAAGGTGGTTACC |
| JN786086 | (variant Ca) | TCATATCGAAACAAACGGGGTTTGATTAACGGATTGGGGAGTCTAGTAAAGGTGGTTACC |
| JN786087 | (variant Ca) | TCATATCGAAACAAACGGGGTTTGATTAACGGATTGGGGAGTCTAGTAAAGGTGGTTACC |























|          |              |                                                                   |
|----------|--------------|-------------------------------------------------------------------|
| JN786097 | (variant Ca) | CCATCCATACCTTCGCTATGGCCGTCAC TTCGA ACT - GGGGGGGGAGGAGTTACCACCC   |
| JN786098 | (variant Cb) | CCATCCCTACCTTCGCTATGGCCGTCACATCGA ACT - - GGGGAGGGAGGAGTTCCACCC   |
| JN786099 | (variant Cb) | CCATCCCTACCTTCGCTATGGCCGTCACATCGA ACT - - GGGGAGGGAGGAGTTCCACCC   |
| JN786100 | (variant Cb) | CCATCCCTACCTTCGCTATGGCCGTCACATCGA ACT - - GGGGAGGGAGGAGTTACCACCC  |
| JN786101 | (variant Cb) | CCATCCCTACCTTCGCTATGGCCGTCACATCGA ACT - - GGGGAGGGAGGAGTTCCACCC   |
| JN786102 | (variant Cb) | CCATCCCTACCTTCGCTATGGCCGTCACATCGA ACT - - GGGGAGGGAGGAGTTCCACCC   |
| JN786103 | (variant Ca) | CCATCCATACCTTCGCTATGGCCGTCAC TTCNNNNN - - NGGGGGGGGGNNTTCCACCC    |
| JN786104 | (variant Ca) | CCATCCATACCTTCGCTATGGCCGTCAC TTCNA ACTGGGGGGGGGANGAGTTNCCNCCC     |
| JQ219965 | (variant Ca) | CCATCCATACCTTCGCTATGGCCGTCAC TTCGA ACT - - GGGGGGGGGGAGNNNNCACCC  |
| JQ219966 | (variant Ca) | CCATCCATACCTTAGCTATGGCCGTCAC - TCGA ACT - GGGGGGGGGGAAGNNNNACCC   |
| JQ219967 | (variant Ca) | CCATCCATACCTTCGCTATGGCCGTCAC TTCGA ACT - - GGGGGGGGGGAAGNNNNCACCC |
| JQ219968 | (variant Ca) | CCATCCATACCTTCGCTATGGCCGTCAC - TCGA ACT - GGGGGGGGGGAGNNNNCACCC   |
| JQ219969 | (variant Ca) | CCATCCATACCTTCGCTATGGCCGTCAC TTCGA ACT - - GGGGGGGGGGAAGNNNNCACCC |
| JQ219970 | (variant Cb) | CCATCCCTACCTTCGCTATGGCCGTCACATCGA ACT - - GGGGAGGGAGGAGTTCCACCC   |
| JQ219971 | (variant Cb) | CCATCCCTACCTTCGCTATGGCCGTCACATCGA ACT - - GGGGAGGGAGGAGTTCCACCC   |

|                |              |             |
|----------------|--------------|-------------|
| D.melanogaster |              | CA-CCCCCTAA |
| JN786085       | (variant Ca) | CA-CCCCCTAA |
| JN786086       | (variant Ca) | CA-CCCCCTAA |
| JN786087       | (variant Ca) | CA-CCCCCTAA |
| JN786088       | (variant Ca) | NN-CCCCCTAA |
| JN786089       | (variant Ca) | CACCCCTAA   |
| JN786090       | (variant Ca) | CN-CCCCCTAA |
| JN786091       | (variant Ca) | CA-CCCCCTAA |
| JN786092       | (variant Ca) | CN-CCCCCTAA |
| JN786093       | (variant Ca) | CA-CCCCCTAA |
| JN786094       | (variant Ca) | CA-CCCCCTAA |
| JN786095       | (variant Ca) | CA-CCCCCTAA |
| JN786096       | (variant Cb) | CA-CCCCCTAA |
| JN786097       | (variant Ca) | CA-CCCCCTAA |
| JN786098       | (variant Cb) | CA-CCCCCTAA |
| JN786099       | (variant Cb) | CA-CCCCCTAA |
| JN786100       | (variant Cb) | CA-CCCCCTAA |
| JN786101       | (variant Cb) | CA-CCCCCTAA |
| JN786102       | (variant Cb) | CA-CCCCCTAA |
| JN786103       | (variant Ca) | CA-CCCCCTAA |
| JN786104       | (variant Ca) | CNCCCCNTAA  |
| JQ219965       | (variant Ca) | CA-CCCCCTAA |
| JQ219966       | (variant Ca) | CA-CCCCCTAA |
| JQ219967       | (variant Ca) | CA-CCCCCTAA |
| JQ219968       | (variant Ca) | CA-CCCCCTAA |
| JQ219969       | (variant Ca) | CA-CCCCCTAA |
| JQ219970       | (variant Cb) | CA-CCCCCTAA |
| JQ219971       | (variant Cb) | CA-CCCCCTAA |

## Proteic alignment of *tirant env* sequences

|                |              |                                                                |
|----------------|--------------|----------------------------------------------------------------|
| D.melanogaster |              | MEQFH LTINKFNPDSTLTDSVTILKTKLTQAQVKLKALTPSYRNKRGLINGLGS LVKVVT |
| JN786085       | (variant Ca) | MEQFH LTINKFNPDSTLTDSVXILKAKLTQAQVKLXALTPSYRNKRGLINGLGS LVKVVT |
| JN786086       | (variant Ca) | MEQFH LTINKFNPDSTLTDSVTILKAKLTQAQVKLKALTPSYRNKRGLINGLGS LVKVVT |
| JN786087       | (variant Ca) | MEQFH LTINKFNPDSTLTDSVTILKAKLTQAQVKLKALTPSYRNKRGLINGLGS LVKVVT |
| JN786088       | (variant Ca) | MEQFXLTINKFNPDSTLTDSVTILKAKLTQAQVKLXALTPSYRNKRGLINGLGS LVKVVT  |
| JN786089       | (variant Ca) | MEQFH LTINKFNPDSTLTDSVTILKAKLTQAQVKLKALTPSYRNKRGLINGLGS LVKVVT |
| JN786090       | (variant Ca) | MEQFXLTINKFNPDSTLTDSVTILKAKLTQAQVKLKALTPSYRNKRGLINGLGS LVKVVT  |
| JN786091       | (variant Ca) | MEQFH LTINKFNPDSTLTDSVTILKAKLTQAQVKLKALTPSYRNKRGLINGLGS LVKVVT |
| JN786092       | (variant Ca) | MEQFH LTINKFNPDSTLTDSVTILKAKLTQAQVKLKALTPSYRNKRGLINGLGS LVKVVT |
| JN786093       | (variant Ca) | MEQFXLTINKFNPDSTLTDSVTILKAKLTQAQVKLKALTPSYRNKRGLINGLGS LVKVVT  |
| JN786094       | (variant Ca) | MEQFH LTINKFNPDSTLTDSVTILKAKLTQAQVKLKALTPSYRNKRGLINGLGS LVKVVT |
| JN786095       | (variant Ca) | MEQFH LTINKFNPDSTLTDSVTILKAKLTQAQVKLKALTPSYRNKRGLINGLGS LVKVVT |
| JN786096       | (variant Cb) | MEQFXLTINKFNPDSTLTDSVTILKAKLTQAQVKLKALTPSYRNKRGLVNLGSPVKVVT    |
| JN786097       | (variant Ca) | MEQFXLTINKFNPDSTLTDSVTILKAKLTQAQVKLKALTPSYRNKRGLINGLGS LVKVVT  |
| JN786098       | (variant Cb) | MEQFH LTINKFNPDSTLTDSVTILKAKLTQAQVKLKALTPSYRNKRGLVNLGSLVKVVT   |
| JN786099       | (variant Cb) | MEQFXLTINKFNPDSTLTDSVTILKAKLTQAQVKLKALTPSYRNKRGLVNLGSLVKVVT    |
| JN786100       | (variant Cb) | MEQFXLTINKFNPDSTLTDSVTILKAKLTQAQVKLKALTPSYRNKRGLVNLGSLVKVVT    |
| JN786101       | (variant Cb) | MEQFH LTINKFNPDSTLTDSVTILKAKLTQAQVKLKALTPSYRNKRGLVNLGSLVKVVT   |
| JN786102       | (variant Cb) | MEQFH LTIXKFNPDSTLTDSVTILKAKLTQAQVKLKALTPSYRNKRGLVNLGSLVKVVT   |
| JN786103       | (variant Ca) | MEQFXLTIXKFNPDSTLTDSVTILKAKLTQAQVKLKALTPSYRNKRGLINGLGS LVKVVT  |
| JN786104       | (variant Ca) | MEQFH LTINKFNPDSTLTDSVTILKAKLTQAQVKLKALTPSYRNKRGLINGLGS LVKVVT |

JQ219965 (variant Ca) MEQFHILTINKFNPDSLTDSATILKAKLTQAQVKLKALTPSYRNKRGLINGLGSVLKVVVT  
 JQ219966 (variant Ca) MEQFHILTINKFNPDSLTDSATILKAKLTQAQVKLKALTPSYRNKRGLINGLGSVLKVVVT  
 JQ219967 (variant Ca) MEQFHILTINKFNPDSLTDSATILKAKLTQAQVKLKALTPSYRNKRGLINGLGSVLKVVVT  
 JQ219968 (variant Ca) MEQFHILTINKFNPDSLTDSATILKAKLTQAQVKLKALTPSYRNKRGLINGLGSVLKVVVT  
 JQ219969 (variant Ca) MEQFHILTINKFNPDSLTDSATILKAKLTQAQVKLKALTPSYRNKRGLINGLGSVLKVVVT  
 JQ219970 (variant Cb) MEQFHILTINKFNTDSTLTDVITLAKKLTQAQVKLKALTPSYRNKRGLVNLGSLVKVVVT  
 JQ219971 (variant Cb) MEQFHILTINKFNTDSTLTDVITLAKKLTQAQVKLKALTPSYRNKRGLVNLGSLVKVVVT

D.melanogaster  
 JN786085 (variant Ca) GNMDANDNKEIHEELDNIIKKNSEVSNLQKQVMFNEILIRFENITDHNNEQILISKF  
 JN786086 (variant Ca) GNMDANDNKEIHEELDNIIKKNSEVSNLQKQVMFNEILIRFENITDHNNEQILISKF  
 JN786087 (variant Ca) GNMDANDNKEIREELDNIIKKNSEVSNLQKQVMFNERLIRFENITDHNNEQILISKF  
 JN786088 (variant Ca) GNMDANDNKEIHEELDNIIKKNSEVSNLQKQVMFNEILIRFENITDHNNEQILISKF  
 JN786089 (variant Ca) GNMDANDNKEIHEELDNIIKKNSEVSNLQKQVMFNEILIRFENITDHNNEQILISKF  
 JN786090 (variant Ca) GNMDANDNKEIREELDNIIKKNSEVSNLQKQVMFNEILIRFENITDHNNEQILISKF  
 JN786091 (variant Ca) GNMDANDNKEIREELDNIIKKNSEVSNLQKQVMFNEILIRFENITDHNNEQILISKF  
 JN786092 (variant Ca) GNMDANDNKEIREELDNIIKKNSEVSNLQKQVMFNEILIRFENITDHNNEQILISKF  
 JN786093 (variant Ca) GNMDANDNKEIREELDNIIKKNSEVSNLQKQVMFNEILIRFENITDHNNEQILISKF  
 JN786094 (variant Ca) GNMDANDNKEIREELDNIIKKNSEVSNLQKQVMFNEILIRFENITDHNNEQILISKF  
 JN786095 (variant Ca) GNMDANDNKEIREELDNIIKKNSEVSNLQKQVMFNEILIRFENITDHNNEQILISKF  
 JN786096 (variant Cb) GNMDANDDKEIHEELDNIIKKNSEVI\*-----  
 JN786097 (variant Ca) GNMDANDNKEIREELDNIIKKNSEVSNLQKQVMFNEILIRFENITDHNNEQILISKF  
 JN786098 (variant Cb) GNMDANDDKEIHEELDNIIKKNSEVI\*-----  
 JN786099 (variant Cb) GNMDANDDKEIHEELDNIIKKNSEVI\*-----  
 JN786100 (variant Cb) GNMDANDDKEIHEELDNIIKKNSEVI\*-----  
 JN786101 (variant Cb) GNMDANDDKEIHEELDNIIKKNSEVI\*-----  
 JN786102 (variant Cb) GNMDANDDKEIHEELDNIIKKNSEVI\*-----  
 JN786103 (variant Ca) GNMDANDNKEIHEELDNIIKKNSEVSNLQKQVMFNEILIRFENITDHNNEQILISKF  
 JN786104 (variant Ca) GNMDANDNKEIHEELDNIIKKNSEVSNLQKQVMFNEILIRFENITDHNNEQILISKF  
 JQ219965 (variant Ca) GNMDANDNKEIREELDNIIKKNSEVSNLQKQVMFNEILIRFENITDHNNEQILISKF  
 JQ219966 (variant Ca) GNMDANDNKEIREELDNIIKKNSEVSNLQKQVMFNEILIRFENITDHNNEQILISKF  
 JQ219967 (variant Ca) GNMDANDNKEIREELDNIIKKNSEVSNLQKQVMFNEILIRFENITDHNNEQILISKF  
 JQ219968 (variant Ca) GNMDANDNKEIREELDNIIKKNSEVSNLQKQVMFNEILIRFENITDHNNEQILISKF  
 JQ219969 (variant Ca) GNMDANDNKEIREELDNIIKKNSEVSNLQKQVMFNEILIRFENITDHNNEQILISKF  
 JQ219970 (variant Cb) GNMDANDDKEIHEELDNIIKKNSEVI\*-----  
 JQ219971 (variant Cb) GNMDANDDKEIHEELDNIIKKNSEVI\*-----

D.melanogaster  
 JN786085 (variant Ca) FDTSQNKIYKHLNLQDTLLEEIQYLNRYNINIELFINHLNDITESMLLAKINIIPKFILN  
 JN786086 (variant Ca) FDTSQNKIYKHLNLQDTLLEEIQYLNRYNINIELFINHLNDITESMLLAKINIIPKFILN  
 JN786087 (variant Ca) FDTSQNKIYKHLNLQDTLLEEIQYLNRYNINIELFINHLNDITESMLLAKINIIPKFILN  
 JN786088 (variant Ca) FDTSQNKIYKHLNLQDTLLEEIQYLNRYNINIELFINHLNDITESMLLAKINIIPKFILN  
 JN786089 (variant Ca) FDTSQNKIYKHLNLQDTLLEEIQYLNRYNINIELFINHLNDITESMLLAKINIIPKFILN  
 JN786090 (variant Ca) FDTSQNKIYKHLNLQDTLLEEIQYLNRYNINIELFINHLNDITESMLLAKINIIPKFILN  
 JN786091 (variant Ca) FDTSQNKIYKHLNLQDTLLEEIQYLNRYNINIELFINHLNDITESMLLAKINIIPKFILN  
 JN786092 (variant Ca) FDTSQNKIYKHLNLQDTLLEEIQYLNRYNINIELFINHLNDITESMLLAKINIIPKFILN  
 JN786093 (variant Ca) FDTSQNKIYKHLNLQDTLLEEIQYLNRYNINIELFINHLNDITESMLLAKINIIPKFILN  
 JN786094 (variant Ca) FDTSQNKIYKHLNLQDTLLEEIQYLNRYNINIELFINHLNDITESMLLAKINIIPKFILN  
 JN786095 (variant Ca) FDTSQNKIYKHLNLQDTLLEEIQYLNRYNINIELFINHLNDITESMLLAKINIIPKFILN  
 JN786096 (variant Cb) FDTSQNKIYKHLNLQDTLLEEIQYLNRYNINIELFINHLNDITESMLLAKINIIPKFILN  
 JN786097 (variant Ca) FDTSQNKIYKHLNLQDTLLEEIQYLNRYNINIELFINHLNDITESMLLAKINIIPKFILN  
 JN786098 (variant Cb) -----  
 JN786099 (variant Cb) -----  
 JN786100 (variant Cb) -----  
 JN786101 (variant Cb) -----  
 JN786102 (variant Cb) -----  
 JN786103 (variant Ca) FDTSQNKIYKHLNLQDTLLEEIQYLNRYNINIELFINHLNXITESMLLAKINIIPKFILX  
 JN786104 (variant Ca) FDTSQNKIYKHLNLQDTLLEEIQYLNRYNINIELFINHLNDITESMLLAKINIIPKFILN  
 JQ219965 (variant Ca) FDTSQNKIYKHLNLQDTLLEEIQYLNRYNINIELFINHLNDITESMLLAKINIIPKFILN  
 JQ219966 (variant Ca) FDTSQNKIYKHLNLQDTLLEEIQYLNRYNINIELFINHLNDITESMLLAKINIIPKFILN  
 JQ219967 (variant Ca) FDTSQNKIYKHLNLQDTLLEEIQYLNRYNINIELFINHLNDITESMLLAKINIIPKFILN  
 JQ219968 (variant Ca) FDTSQNKIYKHLNLQDTLLEEIQYLNRYNINIELFINHLNDITESMLLAKINIIPKFILN  
 JQ219969 (variant Ca) FDTSQNKIYKHLNLQDTLLEEIQYLNRYNINIELFINHLNDITESMLLAKINIIPKFILN  
 JQ219970 (variant Cb) -----  
 JQ219971 (variant Cb) -----

D.melanogaster  
 JN786085 (variant Ca) EQEMDKIKTILEKQNTIVKNEQSIYNFLQMNTLNVEQKIIIFNIKVPIFKQPFHTLARLVP  
 EQEIDKIKTILEKQNTIVKNEQSIYNFLQMNTLNVEQKIIIFNIXVPIFKQPFHTLARLVP

|          |              |                                                              |
|----------|--------------|--------------------------------------------------------------|
| JN786086 | (variant Ca) | EQEIDKIKTILEKQNITVKNEQSIYNFLQMNTLNYEQKIIFNIKVPIFKQPFHTLARLVP |
| JN786087 | (variant Ca) | EQEIDKIKTILEKQNITVKNEQSIYNFLQMNTLNYEQKIIFNIKVPIFKQPFHTLARLVP |
| JN786088 | (variant Ca) | EQEMDKIKTILEKQNITVKNEQSIYNFLQMNTLNYEQKIIFNIKVPIFKQPFHTLARLVP |
| JN786089 | (variant Ca) | EQEMDKIKTILEKQNITVKNEQSIYNFLQMNTLNYEQKIIFNIKVPIFKQPFHTLARLVP |
| JN786090 | (variant Ca) | EQEIDKIKTILEKQNITVKNEQSIYNFLQMNTLNYEQKIIFNIKVPIFKQPFHTLARLVP |
| JN786091 | (variant Ca) | EQEIDKIKTILEKQNITVKNEQSIYNFLQMNTLNYEQKIIFNIKVPIFKQPFHTLARLVP |
| JN786092 | (variant Ca) | EQEIDKIKTILEKQNITVKNEQSIYNFLQMNTLNYEQKIIFNIKVPIFKQPFHTLARLVP |
| JN786093 | (variant Ca) | EQEIDKIKTILEKQNITVKNEQSIYNFLQMNTLNYEQKIMFNKIVPIFKQPFHTLARLVP |
| JN786094 | (variant Ca) | EQEIDKIKTILEKQNITVKNEQSIYNFLQMNTLNYEQKIIFNIKVPIFKQPFHTLARLVP |
| JN786095 | (variant Ca) | EQEIDKIKTILEKQNITVKNEQSIYNFLQMNTLNYEQKIIFNIKVPIFKQPFHTLARLVP |
| JN786096 | (variant Cb) | -----                                                        |
| JN786097 | (variant Ca) | EQEIDKIKTILEKQNITVKNEQSIYNFLQMNTLNYEQKIIFNIKVPIFKQPFHTLARLVP |
| JN786098 | (variant Cb) | -----                                                        |
| JN786099 | (variant Cb) | -----                                                        |
| JN786100 | (variant Cb) | -----                                                        |
| JN786101 | (variant Cb) | -----                                                        |
| JN786102 | (variant Cb) | -----                                                        |
| JN786103 | (variant Ca) | EQEMDKIKTILEKQNITVKNEQSIYNFLXMNTLNYEQKIIFNIKVPIXKQPFHTLARLVP |
| JN786104 | (variant Ca) | EQEMDKIKTILEKQNITVKNEQSIYNFLQMNTLNYEQKIIFNIKVPIFKQPFYTLARLVP |
| JQ219965 | (variant Ca) | EQEIDKIKTILEKQNITVKNEQSIYNFLQMNTLNYEQKIIFNIKVPIFKQPFHTLARLVP |
| JQ219966 | (variant Ca) | EQEIDKIKTILEKQNITVKNEQSIYNFLQMNTLNYEQKIIFNIKVPIFKQPFHTLARLVP |
| JQ219967 | (variant Ca) | EQEIDKIKTILEKQNITVKNEQSIYNFLQMNTLNYEQKIIFNIKVPIFKQPFHTLARLVP |
| JQ219968 | (variant Ca) | EQEIDKIKTILEKQNITVKNEQSIYNFLQMNTLNYEQKIIFNIKVPIFKQPFHTLARLVP |
| JQ219969 | (variant Ca) | EQEIDKIKTILEKQNITVKNEQSIYNFLQMNTLNYEQKIIFNIKVPIFKQPFHTLARLVP |
| JQ219970 | (variant Cb) | -----                                                        |
| JQ219971 | (variant Cb) | -----                                                        |

D. melanogaster

|          |              |                                                                |
|----------|--------------|----------------------------------------------------------------|
| JN786085 | (variant Ca) | LPINNNTYFVITPNYLAYNINNNKFFHMTRKCPKLDNTFLCDEFYVDTQPNNNTCLEHLLNG |
| JN786086 | (variant Ca) | LPINNNTYFVITPNYLAYNINNNKIHMTRKCPKLDNTFLCDEFYVDTQPNNNTCLEHLLNG  |
| JN786087 | (variant Ca) | LPINNNTYFVITPNYLAYNINNNKIHMTRKCPKLDNTFLCDEFYVDTQPNNNTCLEHLLNG  |
| JN786088 | (variant Ca) | LPINNNTYFVITPNYLAYNINNNKFFHMTRKCPKLDNTFLCDEFYVDTQPNSNTCLEHLLNG |
| JN786089 | (variant Ca) | LPINNNTYFVITPNYLAYNINNNKFFHMTRKCPKLDNTFLCDEFYVDTQPNNNTCLEHLLNG |
| JN786090 | (variant Ca) | LPINNNTYFVITPNYLAYNINNNKIHMTRKCPKLDNTFLCDEFYVDTQPNNNTCLEHLLNG  |
| JN786091 | (variant Ca) | LPINNNTYFVITPNYLAYNINNNKIHMTRKCPKLDNTFLCDEFYVDTQPNNNTCLEHLLNG  |
| JN786092 | (variant Ca) | LPINNNTYXVITPNYLAYNINNNKIHMTRKCPKLDNTFLCDEFYVDTQPNNNTCLEHLLNG  |
| JN786093 | (variant Ca) | LPINNNTYFVITPNYLAYNINNNKIHMTRKCPKLDNTFLCDEFYVDTQPNNNTCLEHLLNG  |
| JN786094 | (variant Ca) | LPINNNTYFVITPNYLAYNINNNKIHMTRKCPKLDNTFLCDEFYVDTQPNNNTCLEHLLNG  |
| JN786095 | (variant Ca) | LPINNNTYFVITPNYLAYNINNNKIHMTRKCPKLDNTFLCDEFYVDTQPNNNTCLEHLLNG  |
| JN786096 | (variant Cb) | -----                                                          |
| JN786097 | (variant Ca) | LPINNNTYFVITPNYLAYNINNNKIHMTRKCPKLDNTFLCDEFYVDTQPNNNTCLEHLLNG  |
| JN786098 | (variant Cb) | -----                                                          |
| JN786099 | (variant Cb) | -----                                                          |
| JN786100 | (variant Cb) | -----                                                          |
| JN786101 | (variant Cb) | -----                                                          |
| JN786102 | (variant Cb) | -----                                                          |
| JN786103 | (variant Ca) | LPINNNTYFVITPNYLAYNINNNKFFHMTRKCPKLDNTFLCDEFYVDTQPNNNTCLEHLLNG |
| JN786104 | (variant Ca) | LPINNNTYFVITPNYLAYNINNNKFFHMTRKCPKLDNTFLCDEFYIDTPQNNAXLEHLLNG  |
| JQ219965 | (variant Ca) | LPINNNTYFVITPNYLAYNINNNKIHMTRKCPKLDNTFLCDEFYVDTQPNNNTCLEHLLNG  |
| JQ219966 | (variant Ca) | LPINNNTYFVITPNYLAYNINNNKIHMTRKCPKLDNTFLCDEFYVDTQPNNNTCLEHLLNG  |
| JQ219967 | (variant Ca) | LPINNNTYFVITPNYLAYNINNNKIHMTRKCPKLDNTFLCDEFYVDTQPNNNTCLEHLLNG  |
| JQ219968 | (variant Ca) | LPINNNTYFVITPNYLAYNINNNKIHMTRKCPKLDNTFLCDEFYVDTQPNNNTCLEHLLNG  |
| JQ219969 | (variant Ca) | LPINNNTYFVITPNYLAYNINNNKIHMTRKCPKLDNTFLCDEFYVDTQPNNNTCLEHLLNG  |
| JQ219970 | (variant Cb) | -----                                                          |
| JQ219971 | (variant Cb) | -----                                                          |

D. melanogaster

|          |              |                                                              |
|----------|--------------|--------------------------------------------------------------|
| JN786085 | (variant Ca) | ENSSCDVRETGPITDVFEAERGYIFAFNVNKLKVSLTNGSELSIMGSAIIRYINETIQIN |
| JN786086 | (variant Ca) | ENSSCDVRETGPITDVFEAERGYIFAFNVNKLKVSLTNGSELSIMGSAIIRYINETIQIN |
| JN786087 | (variant Ca) | ENSSCDVRETGPITDVFEAERGYIFAFNVNKLKVSLTNGSELSIMGSAIIRYINETIQIN |
| JN786088 | (variant Ca) | ENSSCDVRETGPITDVFEAERGYIFAFNVNKLKVSLTNGSELSIMGSAIIRYINETIQIN |
| JN786089 | (variant Ca) | ENSSCDVRETGPITDVFEAERGYIFAFNVNKLKVSLTNGSELSIMGSAIIRYINETIQIN |
| JN786090 | (variant Ca) | ENSSCDVRETGPITDVFEAERGYIFAFNVNKLKVSLTNGSELSIMGSAIIRYINETIQIN |
| JN786091 | (variant Ca) | ENSSCDVRETGPITDVFEAERGYIFAFNVNKLKVSLTNGSELSIMGSAIIRYINETIQIN |
| JN786092 | (variant Ca) | ENSSCDVRETGPITDVFEAERGYIFAFNVNKLKVSLTNGSELSIMGSAIIRYINETIQIN |
| JN786093 | (variant Ca) | ENSSCDVRETGPITDVFEAERGYIFAFNVNKLKVSLTNGSELSIMGSAIIRYINETIQIN |
| JN786094 | (variant Ca) | ENSSCDVRETGPITDVFEAERGYIFAFNVNKLKVSLTNGSELSIMGSAIIRYINETIQIN |
| JN786095 | (variant Ca) | ENSSCDVRETGPITDVFEAERGYIFAFNVNKLKVSLTNGSELSIMGSAIIRYINETIQIN |
| JN786096 | (variant Cb) | -----                                                        |



|          |              |                                                              |
|----------|--------------|--------------------------------------------------------------|
| JN786097 | (variant Ca) | ENSSCDVRETGPITDVFEAERGYIFAFNVNKLKVSLTNGSELSIMGSAIIRYINETIQII |
| JN786098 | (variant Cb) | -----                                                        |
| JN786099 | (variant Cb) | -----                                                        |
| JN786100 | (variant Cb) | -----                                                        |
| JN786101 | (variant Cb) | -----                                                        |
| JN786102 | (variant Cb) | -----                                                        |
| JN786103 | (variant Ca) | ENSSCDVRETGPITDVFEAERGYIFAFNVNKLKVSLTNGSELSIMGSAFIRYINETIQIN |
| JN786104 | (variant Ca) | ENSSCDVRETGPITDVFEAXRGYIFXFNVNKLKVSLTNGSXLSIMGSAIIRYINETIQIN |
| JQ219965 | (variant Ca) | ENSSCDVRETGPITDVFEAERGYIFAFNVNKLKVSLTNGSELSIMGSAIIRYINETIQIN |
| JQ219966 | (variant Ca) | ENSSCDVRETGPITDVFEAERGYIFAFNVNKLKVSLTNGSELSIMGSAIIRYINETIQIN |
| JQ219967 | (variant Ca) | ENSSCDVRETGPITDVFEAERGYIFAFNVNKLKVSLTNGSELSIMGSAIIRYINETIQIN |
| JQ219968 | (variant Ca) | ENSSCDVRETGPITDVFEAERGYIFAFNVNKLKVSLTNGSELSIMGSAIIRYINETIQIN |
| JQ219969 | (variant Ca) | ENSSCDVRETGPITDVFEAERGYIFAFNVNKLKVSLTNGSELSIMGSAIIRYINETIQIN |
| JQ219970 | (variant Cb) | -----                                                        |
| JQ219971 | (variant Cb) | -----                                                        |

D. melanogaster

|          |              |                                                              |
|----------|--------------|--------------------------------------------------------------|
| JN786085 | (variant Ca) | GIDYDGTVDTFPEQTFDFLPPMRKVTRNTTITVLSLEKLHLEATQTMDKILAVHHNTIQH |
| JN786086 | (variant Ca) | GIDYDGTVDTFPEQTFDFLPPMRKVTRNTTITVLSLEKLHLEATQTMDKILAVHHNTIQH |
| JN786087 | (variant Ca) | GIDYDGTVDTFPEQTFDFLPPMRKVTRNTTITVLSLEKLHLEATQTMDKILAVHHNTIQH |
| JN786088 | (variant Ca) | GIDYDGTVDTFPEQTFDFLPPMRKVTRNTTITVLSLEKLHLEATQTMDKILAVHHNTIQH |
| JN786089 | (variant Ca) | GIDYDGTVDTFPEQTFDFLPPMRKVTRNTTITVLSLEKLHLEATQTMDKILAVHHNTIQH |
| JN786090 | (variant Ca) | GIDYDGTVDTFPEQTFDFLPPMRKVTRNTTITVLSLEKLHLEATQTMDKILAVHHNTIQH |
| JN786091 | (variant Ca) | GIDYDGTVDTFPEQTFDFLPPMRKVTRNTTITVLSLEKLHLEATQTMDKILAVHHNTIQH |
| JN786092 | (variant Ca) | GIDYDGTVDTFPEQTFDFLPPMRKVTRNTTITVLSLEKLHLEATQTMDKILAVHHNTIQH |
| JN786093 | (variant Ca) | GIDYDGTVDTFPEQTFDFLPPMRKVTRNTTITVLSLEKLHLEATQTMDKILAVHHNTIQH |
| JN786094 | (variant Ca) | GIDYDGTVDTFPEQTFDFLPPMRKVTRNTTITVLSLEKLHLEATQTMDKILAVHHNTIQH |
| JN786095 | (variant Ca) | GIDYDGTVDTFPEQTFDFLPPMRKVTRNTTITVLSLEKLHLEATQTMDKILAVHHNTIQH |
| JN786096 | (variant Cb) | -----                                                        |
| JN786097 | (variant Ca) | GIDYDGTVDTFPEQTFDFLPPMRKVTRNTTITVLSLEKLHLEATQTMDKILAVHHNTIQH |
| JN786098 | (variant Cb) | -----                                                        |
| JN786099 | (variant Cb) | -----                                                        |
| JN786100 | (variant Cb) | -----                                                        |
| JN786101 | (variant Cb) | -----                                                        |
| JN786102 | (variant Cb) | -----                                                        |
| JN786103 | (variant Ca) | GIDYXGTVDTFPEQTFDFLPPMRKVTRNTTITVLSLEKLHLEATQTMDKILAVHHNTIQH |
| JN786104 | (variant Ca) | GIDYDGTVDTFPEQTFDFLPPMRKVTRNTTITVLSLEKLHLEATQTMDKILAVHHNTIQH |
| JQ219965 | (variant Ca) | GIDYDGTVDTFPEQTFDFLPPMRKVTRNTTITVLSLEKLHLEATQTMDKILAVHHNTIQH |
| JQ219966 | (variant Ca) | GIDYDGTVDTFPEQTFDFLPPMRKVTRNTTITVLSLEKLHLEATQTMDKILAVHHNTIQH |
| JQ219967 | (variant Ca) | GIDYDGTVDTFPEQTFDFLPPMRKVTRNTTITVLSLEKLHLEATQTMDKILAVHHNTIQH |
| JQ219968 | (variant Ca) | GIDYDGTVDTFPEQTFDFLPPMRKVTRNTTITVLSLEKLHLEATQTMDKILAVHHNTIQH |
| JQ219969 | (variant Ca) | GIDYDGTVDTFPEQTFDFLPPMRKVTRNTTITVLSLEKLHLEATQTMDKILAVHHNTIQH |
| JQ219970 | (variant Cb) | -----                                                        |
| JQ219971 | (variant Cb) | -----                                                        |

D. melanogaster

|          |              |                                                               |
|----------|--------------|---------------------------------------------------------------|
| JN786085 | (variant Ca) | TWTLYTLGLVTLFLAVILWLHRRTKHIVHIHEDHHVPIYASSIPSLWPSLRTGGGGVTTTP |
| JN786086 | (variant Ca) | TWTLYTLGLVTLAVILWLHRRTKHIVHIHEDHHVPIYAPSIPSLWPSLRTGGGXSYHP    |
| JN786087 | (variant Ca) | TWTLYTLGLVTLAVILWLHRRTKHIVHIHEDHHVPIYAPSIPSLWPSLRTGGGEELPP    |
| JN786088 | (variant Ca) | TWTLYTLGLVTLAVILWLHRRTKHIVHIHEDHHVPIYAPSIPSLWPSLRTGGGXSYHP    |
| JN786089 | (variant Ca) | TWTLYTLGLVTLAVILWLHRRTKHIVHIHEDHHVPIYAPSIPSLWPSLRTGGGGXPP     |
| JN786090 | (variant Ca) | TWTLYTLGLVTLAVILWLHRRTKHIVHIHEDHHVPIYAPFIPSLWPSLRTGGGGVTTTP   |
| JN786091 | (variant Ca) | TWTLYTLGLVTLAVILWLHRRTKHIVHIHEDHHVPIYAPSIPSLWPSLRTGGGRSYHP    |
| JN786092 | (variant Ca) | TWTLYTLGLVTLAVILWLHRRTKHIVHIHEDHHVPIYAPSIPSLWPSLRTGGGXSYHP    |
| JN786093 | (variant Ca) | TWTLYTLGLVTLAVILWLHRRTKHIVHIHEDHHVPIYAPSIPSLWPSLRTGGGRSYXP    |
| JN786094 | (variant Ca) | TWTLYTLGLVTLAVILWLHRRTKHIVHIHEDHHVPIYAPSIPSLWPSLRTGGGRSYHP    |
| JN786095 | (variant Ca) | T*-----                                                       |
| JN786096 | (variant Cb) | -----                                                         |
| JN786097 | (variant Ca) | TWTLYTLGLVTLAVILWLHRRTKHIVHIHEDHHVPIYAPSIPSLWPSLRTGGGRSYHP    |
| JN786098 | (variant Cb) | -----                                                         |
| JN786099 | (variant Cb) | -----                                                         |
| JN786100 | (variant Cb) | -----                                                         |
| JN786101 | (variant Cb) | -----                                                         |
| JN786102 | (variant Cb) | -----                                                         |
| JN786103 | (variant Ca) | TWTLYTLGLVTLAVILWLHRRTKHIVHIHEDHHVPIYAPSIPSLWPSLXXXGGGXSTP    |
| JN786104 | (variant Ca) | TWTLYTLGLVTLAVILWLHRRTKHIVHIHEDHHVPIYAPSIPSLWPSLXTGGGXEXPP    |
| JQ219965 | (variant Ca) | TWTLYTLGLVTLAVILWLHRRTKHIVHIHEDHHVPIYAPSIPSLWPSLRTGGGGXTP     |
| JQ219966 | (variant Ca) | TWTLYTLGLVTLAVILWLHRRTKHIVHIHEDHHVPIYAPSIP*-----              |
| JQ219967 | (variant Ca) | TWTLYTLGLVTLAVILWLHRRTKHIVHIHEDHHVPIYAPSIPSLWPSLRTGGGXSTP     |

|          |              |                                                                |
|----------|--------------|----------------------------------------------------------------|
| JQ219968 | (variant Ca) | TWTLYTLLGLVTS LAVILWLHRR TKHIVHIHEDHHVPIYAPSIPSLWPSLELGGGEXXTP |
| JQ219969 | (variant Ca) | TWTLYTLLGLVTS LAVILWLHRR TKHIVHIHEDHHVPIYAPSIPSLWPSLRTGGGEXXTP |
| JQ219970 | (variant Cb) | -----                                                          |
| JQ219971 | (variant Cb) | -----                                                          |

|                |              |     |
|----------------|--------------|-----|
| D.melanogaster |              | PP- |
| JN786085       | (variant Ca) | TP* |
| JN786086       | (variant Ca) | HPL |
| JN786087       | (variant Ca) | TP* |
| JN786088       | (variant Ca) | XP* |
| JN786089       | (variant Ca) | PP* |
| JN786090       | (variant Ca) | XP* |
| JN786091       | (variant Ca) | TP* |
| JN786092       | (variant Ca) | XP* |
| JN786093       | (variant Ca) | TP* |
| JN786094       | (variant Ca) | TP* |
| JN786095       | (variant Ca) | --- |
| JN786096       | (variant Cb) | --- |
| JN786097       | (variant Ca) | TP* |
| JN786098       | (variant Cb) | --- |
| JN786099       | (variant Cb) | --- |
| JN786100       | (variant Cb) | --- |
| JN786101       | (variant Cb) | --- |
| JN786102       | (variant Cb) | --- |
| JN786103       | (variant Ca) | PP- |
| JN786104       | (variant Ca) | XP- |
| JQ219965       | (variant Ca) | PP- |
| JQ219966       | (variant Ca) | --- |
| JQ219967       | (variant Ca) | PP- |
| JQ219968       | (variant Ca) | PP- |
| JQ219969       | (variant Ca) | PP- |
| JQ219970       | (variant Cb) | --- |
| JQ219971       | (variant Cb) | --- |
